# Supplementary material
Source: PubMed Central journal article supplement (PMC6935298)
Supplement: NIHMS1064183-supplement-SI.pdf [file NIHMS1064183-supplement-SI.pdf]

# Supporting Information

## Assessing Lysine and Cysteine Reactivities for Designing Targeted Covalent Kinase Inhibitors

Ruibin Liu,<sup>†</sup> Zhi Yue,<sup>†,‡</sup> Cheng-Chieh Tsai,<sup>†</sup> and Jana Shen<sup>\*,†</sup>

<sup>†</sup> *Department of Pharmaceutical Sciences, University of Maryland School of Pharmacy,  
Baltimore, MD 21201*

<sup>‡</sup> *Current address: Department of Chemistry, University of Chicago, Chicago, IL 60637*

E-mail: [jana.shen@rx.umaryland.edu](mailto:jana.shen@rx.umaryland.edu)

### Supplementary Tables

Table S1: Calculated  $pK_a$ 's of the catalytic lysines as well as reactive lysines and cysteines in the kinase dataset studied by continuous CpHMD

| PDB ID | Kinase name   | Kinase group | Inhibitor type <sup>a</sup> | $pK_a$ catalytic Lys <sup>b</sup> | $pK_a$ other Lys <sup>b</sup> | $pK_a$ reactive Cys <sup>c</sup>      |
|--------|---------------|--------------|-----------------------------|-----------------------------------|-------------------------------|---------------------------------------|
| 2G2F   | ABL1          | TK           | II                          | 8.5 (K271)                        | -                             | 8.0 (C305)                            |
| 5U8L   | EGFR          | TK           | II                          | 7.3 (K745)                        | 8.2 (K852)                    | 8.1 (C781)                            |
| 5UG8   | EGFR(mt)      | TK           | II                          | 7.1 (K745)                        | -                             | 8.1 (C781)                            |
| 4MXC   | MET           | TK           | II                          | 7.7 (K1110)                       | -                             | -                                     |
| 3V5Q   | NTRK3         | TK           | II                          | 9.7 (K572)                        | -                             | -                                     |
| 5K9I   | c-SRC         | TK           | II                          | 8.1 (K295)                        | -                             | 6.8 (C277)                            |
| 4TPT   | LIMK2         | TKL          | III                         | 9.1 (K360)                        | -                             | 5.8 (C365)                            |
| 4ITJ   | RIPK1         | TKL          | III                         | 6.7 (K45)                         | -                             | 8.3 (C53)                             |
| 4USD   | LOK           | STE          | II                          | 9.0 (K65)                         | -                             | 7.6 (C206)                            |
| 4ZLO   | PAK1          | STE          | II                          | 9.7 (K299)                        | -                             | 5.0 (C411) <sup>d</sup>               |
| 3NAX   | PDK1          | AGC          | II                          | 7.0 (K111)                        | -                             | 6.0 (C260)                            |
| 2YZA   | AMPKa2        | CAMK         | II                          | 8.3 (K45)                         | -                             | -                                     |
| 1G3N   | CDK6          | CMGC         | None                        | 6.1 (K43)                         | 6.0 (K147)                    | 7.9 (C15)                             |
| 4JAI   | Aurora        | Other        | II                          | 7.9 (K162)                        | -                             | 5.4 (C290) <sup>d</sup>               |
| 4YZ9   | IRE1 $\alpha$ | Other        | II                          | 8.8 (K599)                        | -                             | 5.8 (C715)<br>7.9 (C747) <sup>d</sup> |
| 2XNM   | NEK2          | Other        | II                          | 7.8 (K37)                         | -                             | -                                     |
| 4X7N   | PEK           | Other        | II                          | 7.6 (K622)                        | 7.3 (K151)                    | 5.2 (C261)                            |
| 6FDZ   | ULK3          | Other        | II                          | 9.2 (K44)                         | -                             | -                                     |

<sup>a</sup> Inhibitor type is defined in the main text. Inhibitors were removed in the simulations.

<sup>b</sup> The first 0.2 ns (per replica) was discarded in the lysine  $pK_a$  calculations.

<sup>c</sup> For the cysteine  $pK_a$  calculations, the first 1 ns (per replica) was discarded due to the need for longer equilibration time and slower convergence. We note, since the cysteine  $pK_a$  obtained from the second half of the simulation was always lower than that from the first half, the conclusion regarding reactivity was not affected. A large-scale validation study for cysteine  $pK_a$  calculations will be conducted in the future.

<sup>d</sup> These residues were missing in the crystal structures and their positions were built using SWISS-MODEL.<sup>1</sup>

Table S2: Calculated and experimental cysteine and lysine  $pK_a$ 's in the validation systems

| Protein | PDB  | Residue | Expt <sup>a</sup> | CpHMD | Propka <sup>b</sup> |
|---------|------|---------|-------------------|-------|---------------------|
| Kinase  | 1I0E | C283    | 5.6               | 5.5   | 10.4                |
| V74K    | 3RUZ | K74     | 7.4               | 6.8   | 9.1                 |
| V99K    | 4HMI | K99     | 6.5               | 5.8   | 7.5                 |
| L125K   | 3C1E | K125    | 6.2               | 5.6   | 7.3                 |

<sup>a</sup> The experimental  $pK_a$  of Cys283 in creatine kinase is taken from ref.<sup>2</sup> The  $pK_a$ 's of lysines in the SNase mutants are taken from ref.<sup>3</sup>

<sup>b</sup> Propka3.1<sup>4</sup> was used.

Table S3: Calculated  $pK_a$ 's for lysines in the V74K mutant of SNase and cysteine in creatine kinase

| SNase (PDB: 3RUZ) |        | Creatine kinase (PDB: 1I0E) |        |
|-------------------|--------|-----------------------------|--------|
| Residue           | $pK_a$ | Residue                     | $pK_a$ |
| K9                | 11.5   | C74                         | > 11   |
| K16               | 10.1   | C146                        | 10.8   |
| K24               | 8.7    | C254                        | > 11   |
| K28               | 11.1   | C283                        | 5.5    |
| K53               | 10.8   |                             |        |
| K63               | 10.7   |                             |        |
| K64               | 11.0   |                             |        |
| K70               | 10.9   |                             |        |
| K71               | 10.7   |                             |        |
| K74               | 7.2    |                             |        |
| K78               | 10.5   |                             |        |
| K84               | 10.6   |                             |        |
| K97               | 10.9   |                             |        |
| K110              | 10.9   |                             |        |
| K116              | 10.4   |                             |        |
| K127              | 10.6   |                             |        |
| K133              | 11.3   |                             |        |
| K134              | 10.6   |                             |        |
| K136              | 11.2   |                             |        |

## Supplementary Figures

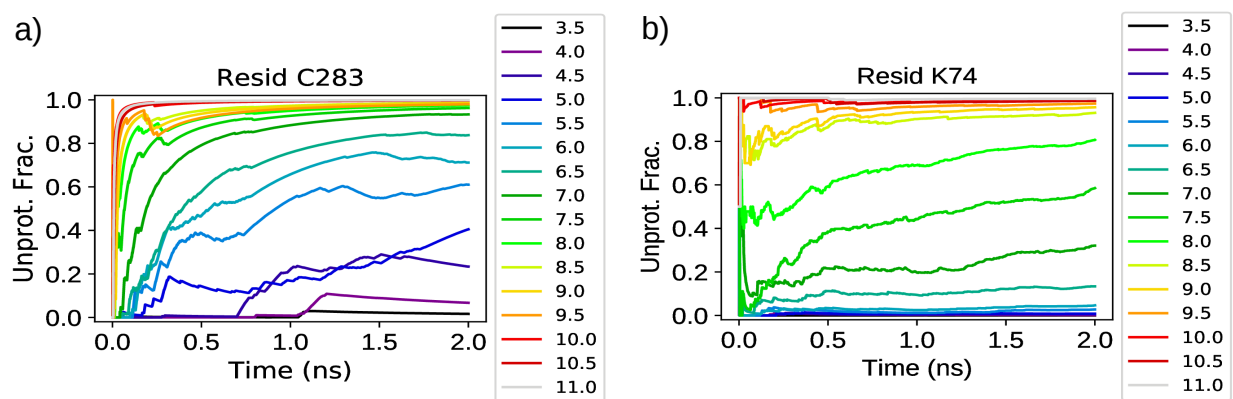

Figure S1: **Data from the CpHMD simulations of creatine kinase and V74K SNase.**  
a) Cumulatively calculated unprotonated fraction versus time at different pH for Cys283 in creatine kinase (PDB: 1I0E). b) Cumulatively calculated unprotonated fraction versus time at different pH for Lys74 in V74K SNase (PDB: 3RUZ).

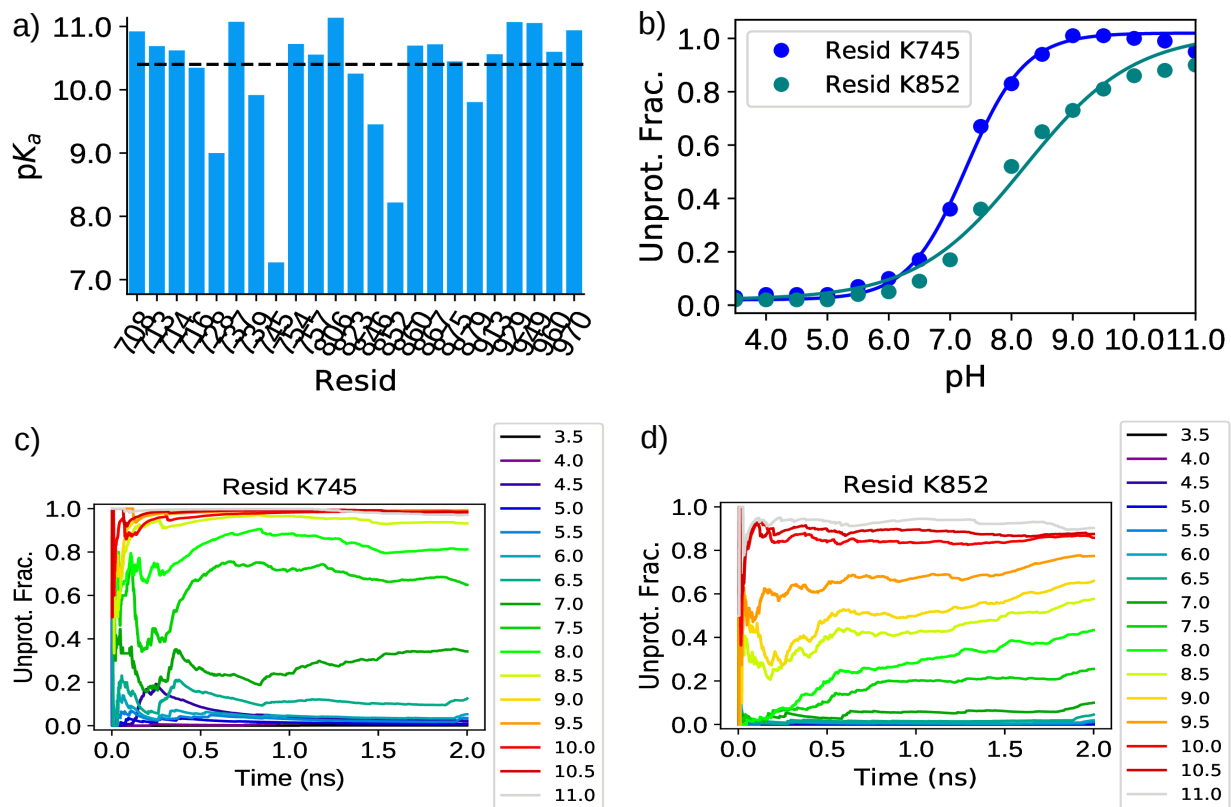

Figure S2: **Data from the CpHMD simulations of the wild-type EGFR kinase (PDB: 5U8L).** a) Calculated  $pK_a$ 's for all lysines. The dashed line represents the model  $pK_a$  of lysine. b) Titration plots (unprotonated fractions at different pH) for the reactive lysines. c) and d) Cumulatively calculated unprotonated fraction versus time at different pH for the reactive lysines.

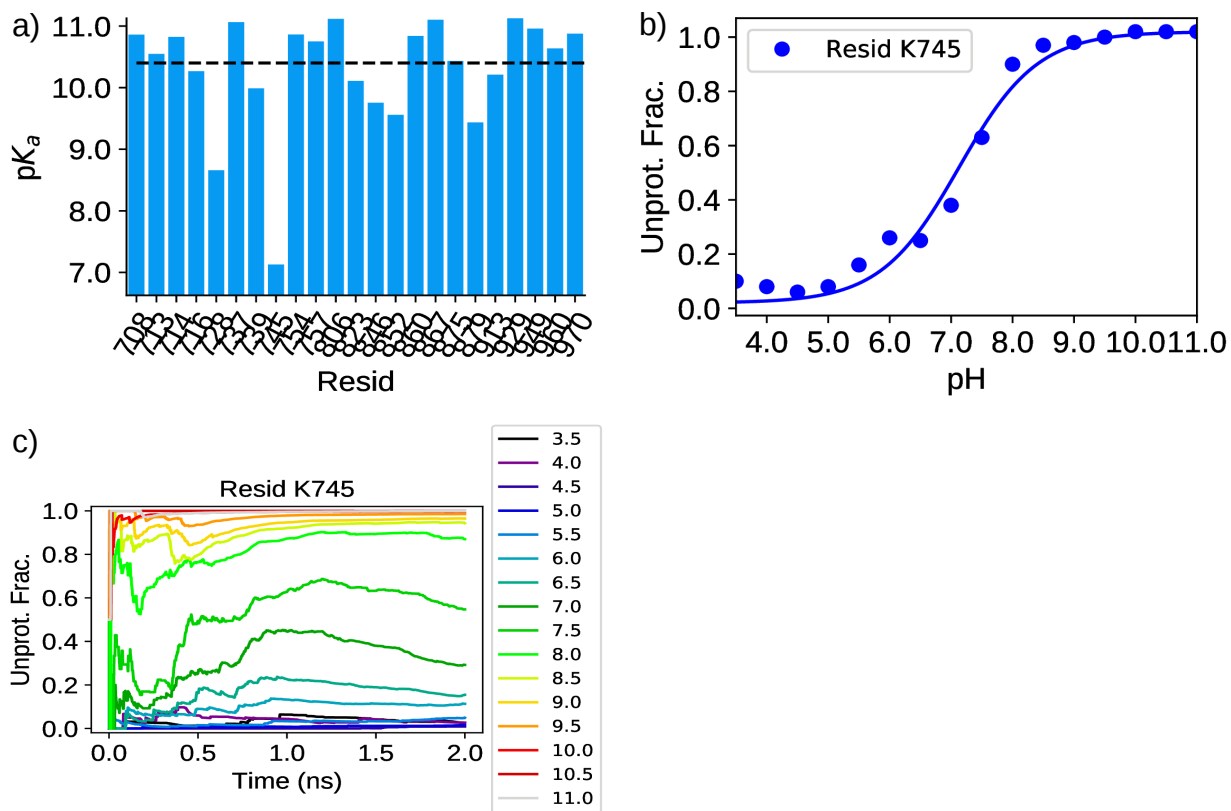

Figure S3: **Data from the CpHMD simulations of the mutant EGFR kinase (PDB: 5UG8).** a) Calculated  $pK_a$ 's for all lysines. The dashed line represents the model  $pK_a$  of lysine. b) Titration plots (unprotonated fractions at different pH) for the reactive lysines. c) Cumulatively calculated unprotonated fraction versus time at different pH for the reactive lysine.

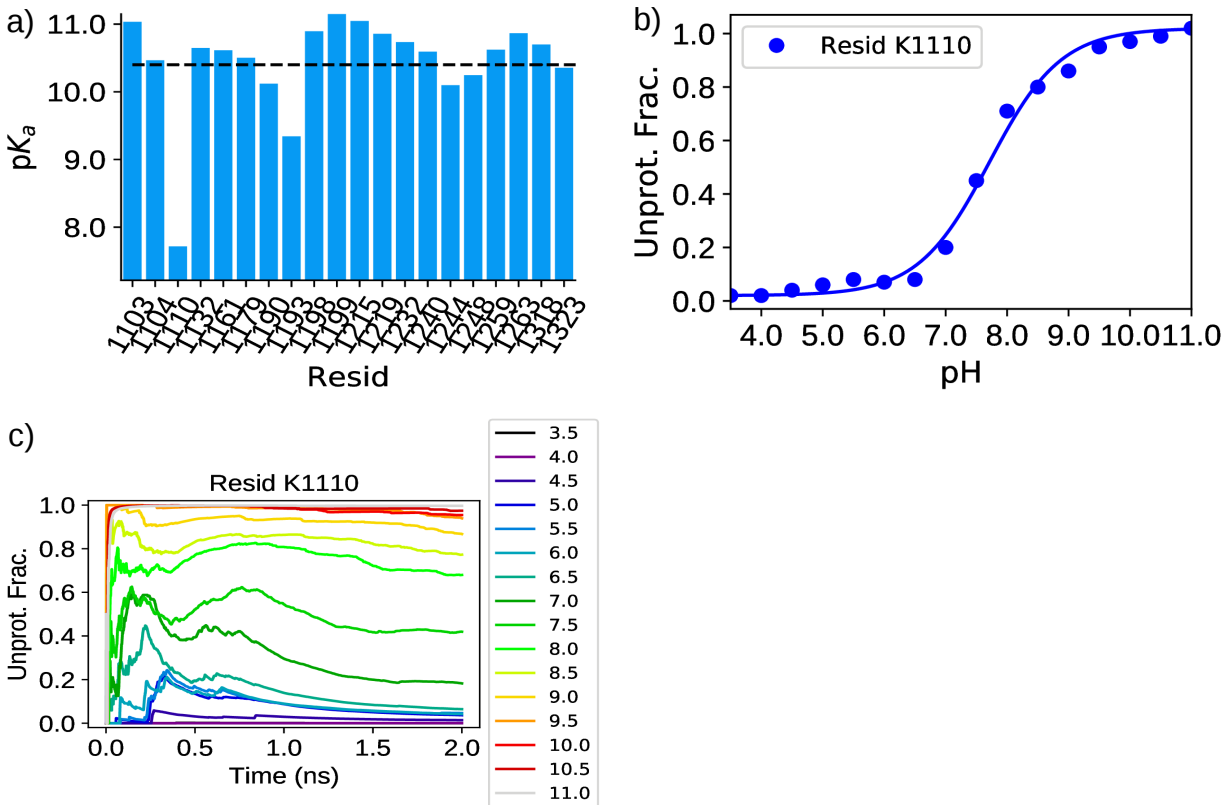

Figure S4: **Data from the CpHMD simulations of the MET kinase (PDB: 4MXC).** a) Calculated  $pK_a$ 's for all lysines. The dashed line represents the model  $pK_a$  of lysine. b) Titration plots (unprotonated fractions at different pH) for the reactive lysines. c) Cumulatively calculated unprotonated fraction versus time at different pH for the reactive lysine.

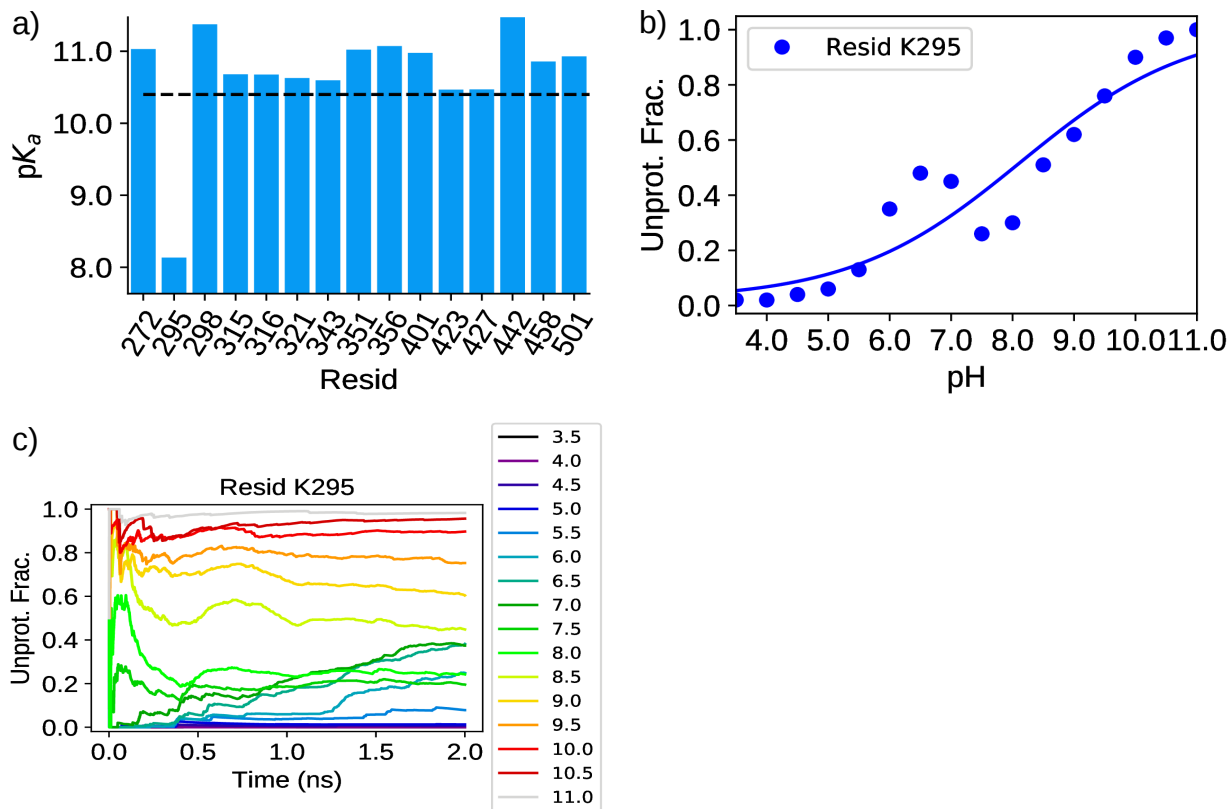

Figure S5: **Data from the CpHMD simulations of the c-SRC kinase (PDB: 5K9I).** a) Calculated  $pK_a$ 's for all lysines. The dashed line represents the model  $pK_a$  of lysine. b) Titration plots (unprotonated fractions at different pH) for the reactive lysines. c) Cumulatively calculated unprotonated fraction versus time at different pH for the reactive lysine.



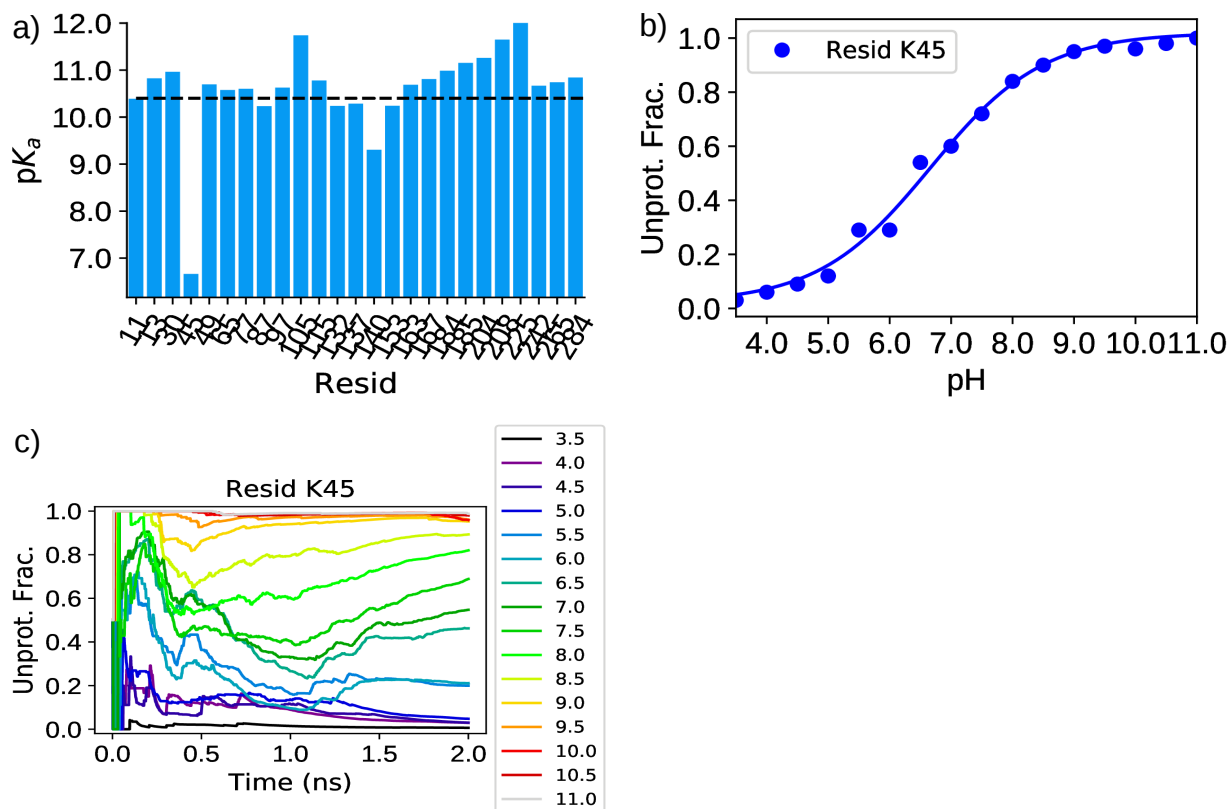

Figure S6: **Data from the CpHMD simulations of the RIPK1 kinase (PDB: 4ITJ).** a) Calculated  $pK_a$ 's for all lysines. The dashed line represents the model  $pK_a$  of lysine. b) Titration plots (unprotonated fractions at different pH) for the reactive lysines. c) Cumulatively calculated unprotonated fraction versus time at different pH for the reactive lysine.

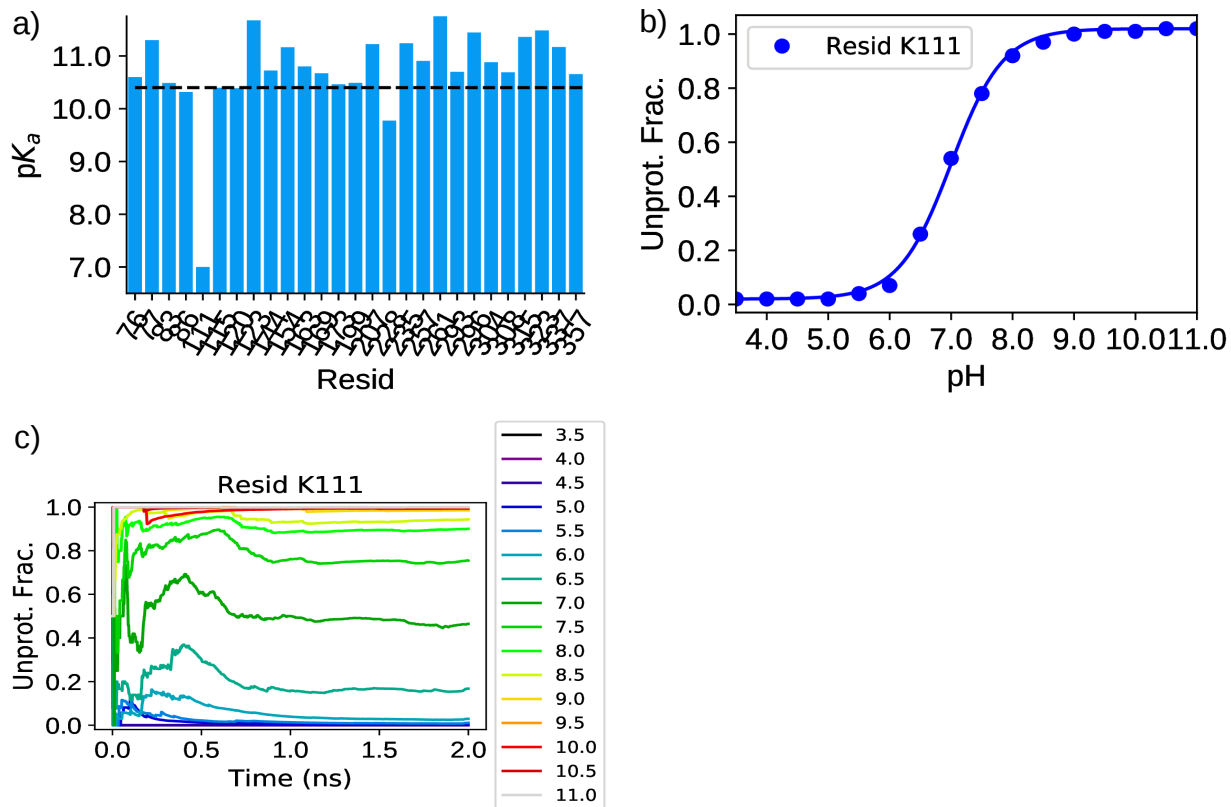

Figure S7: **Data from the CpHMD simulations of the PDK1 kinase (PDB: 3NAX).** a) Calculated  $pK_a$ 's for all lysines. The dashed line represents the model  $pK_a$  of lysine. b) Titration plots (unprotonated fractions at different pH) for the reactive lysines. c) Cumulatively calculated unprotonated fraction versus time at different pH for the reactive lysine.

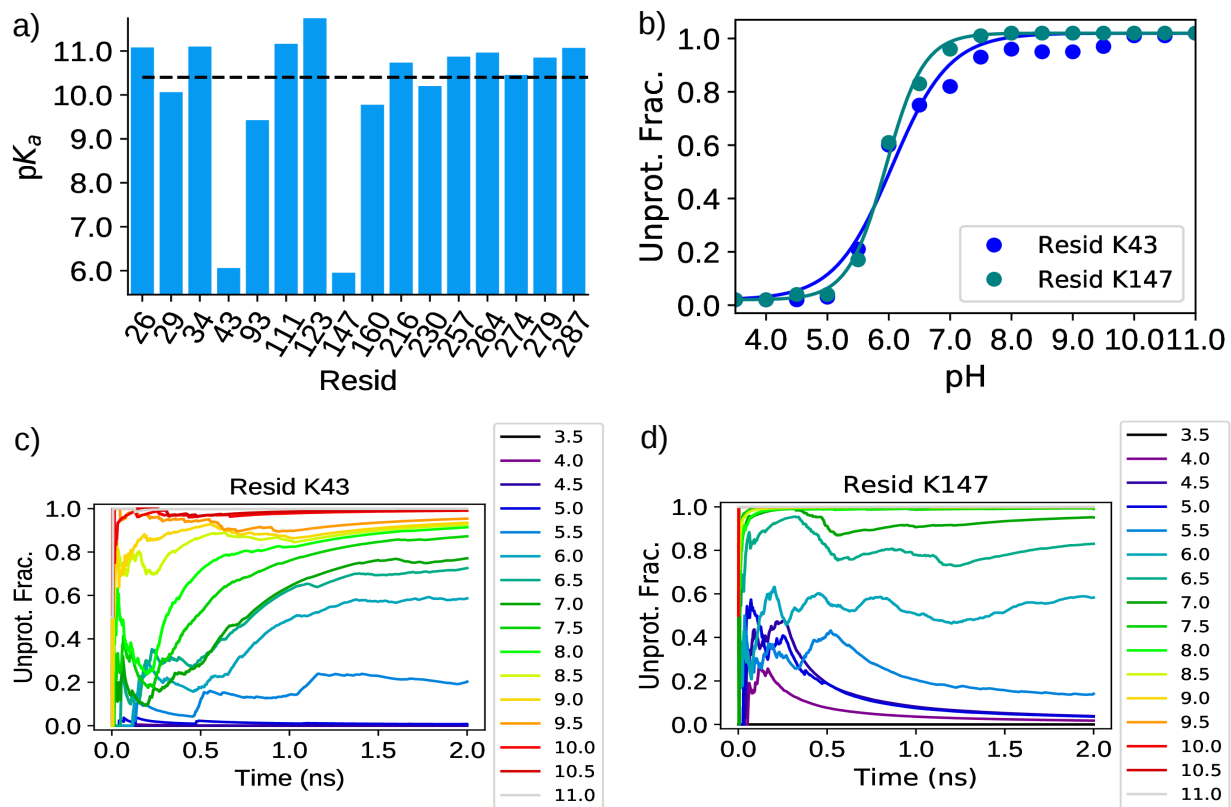

Figure S8: **Data from the CpHMD simulations of the CDK6 kinase (PDB: 1G3N).** a) Calculated  $pK_a$ 's for all lysines. The dashed line represents the model  $pK_a$  of lysine. b) Titration plots (unprotonated fractions at different pH) for the reactive lysines. c) and d) Cumulatively calculated unprotonated fraction versus time at different pH for the reactive lysines.

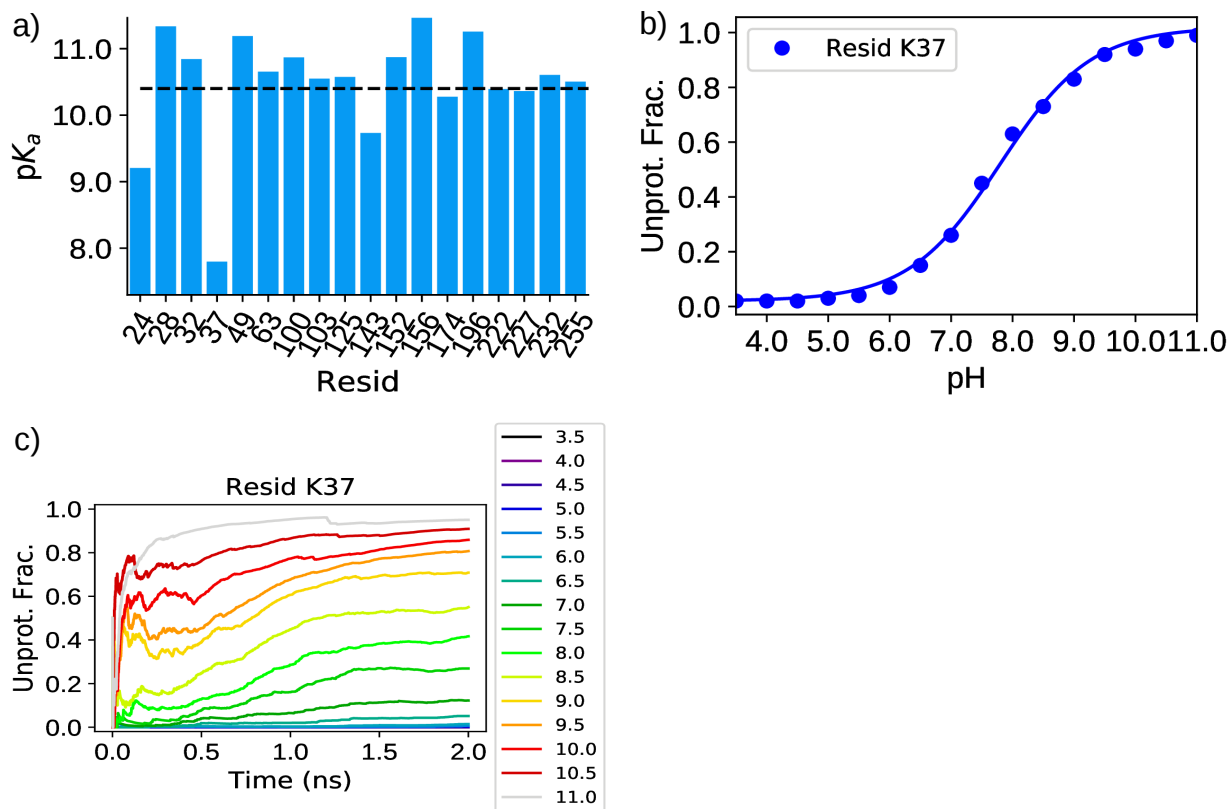

Figure S9: **Data from the CpHMD simulations of the NEK2 kinase (PDB: 2XNM).** a) Calculated  $pK_a$ 's for all lysines. The dashed line represents the model  $pK_a$  of lysine. b) Titration plots (unprotonated fractions at different pH) for the reactive lysines. c) Cumulatively calculated unprotonated fraction versus time at different pH for the reactive lysine.

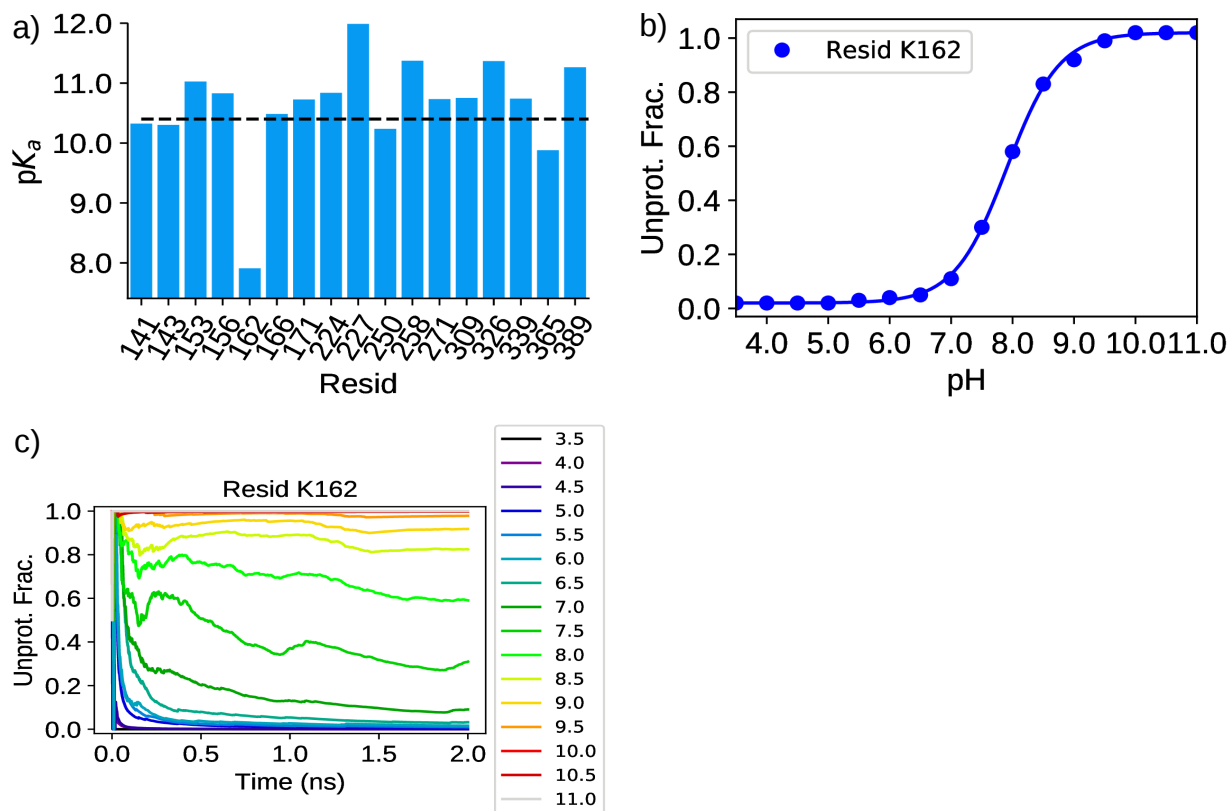

Figure S10: **Data from the CpHMD simulations of the Aurora kinase (PDB: 4JAI).** a) Calculated  $pK_a$ 's for all lysines. The dashed line represents the model  $pK_a$  of lysine. b) Titration plots (unprotonated fractions at different pH) for the reactive lysines. c) Cumulatively calculated unprotonated fraction versus time at different pH for the reactive lysine.

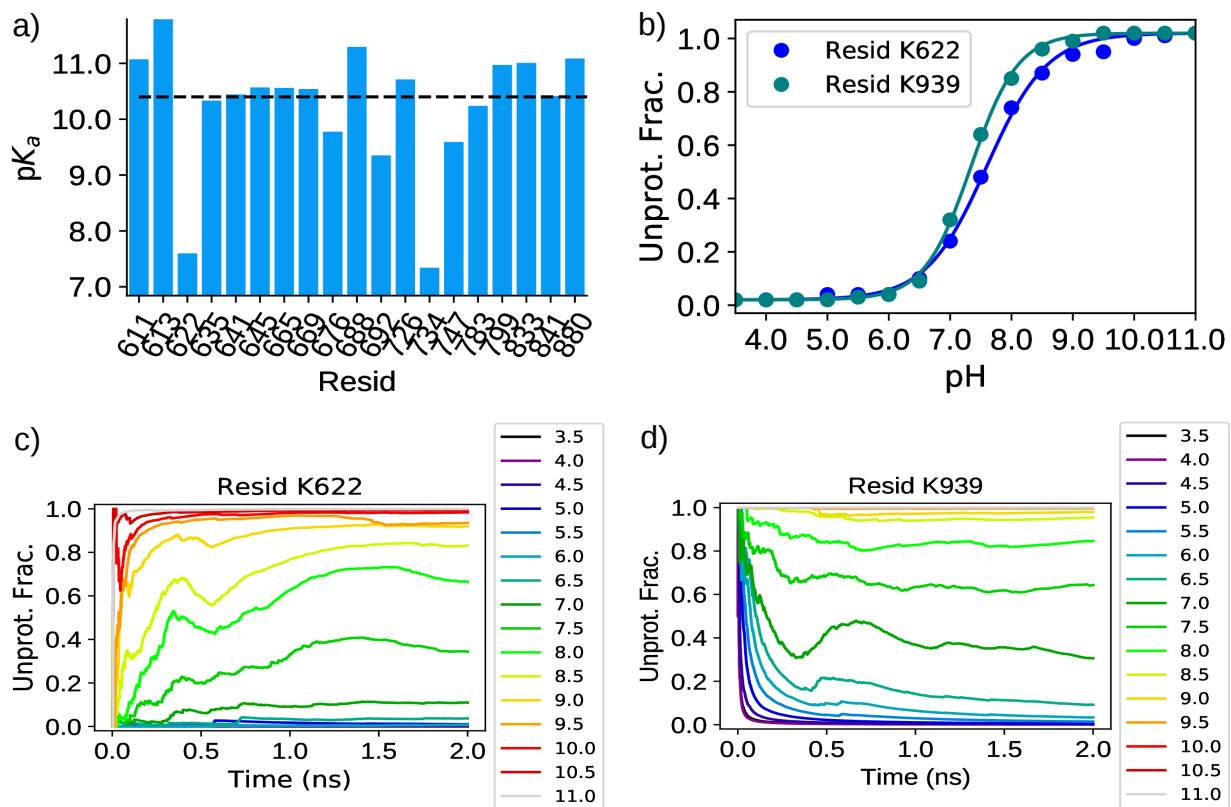

Figure S11: **Data from the CpHMD simulations of the PEK kinase (PDB: 4X7N).** a) Calculated  $pK_a$ 's for all lysines. The dashed line represents the model  $pK_a$  of lysine. b) Titration plots (unprotonated fractions at different pH) for the reactive lysines. c) Cumulatively calculated unprotonated fraction versus time at different pH for the reactive lysines.

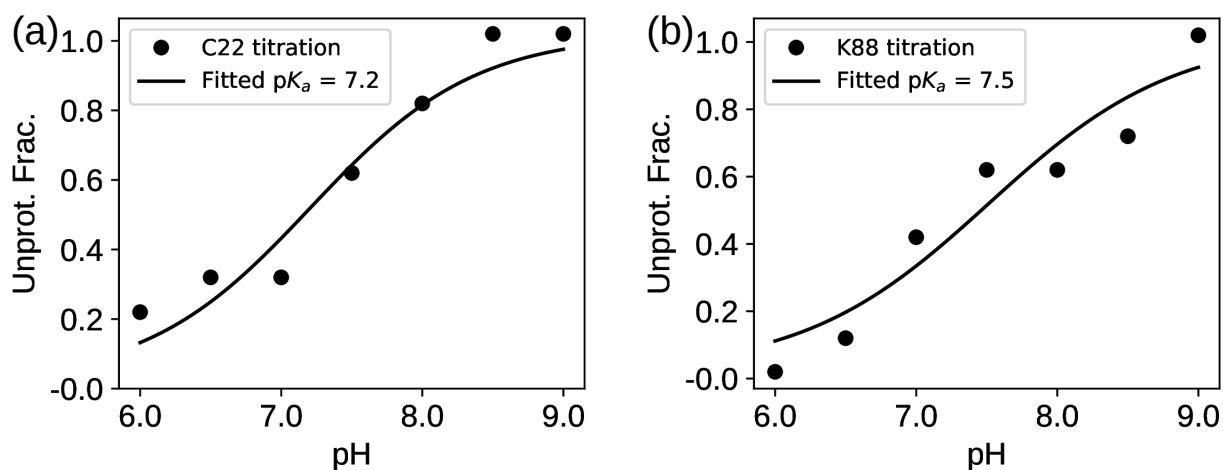

Figure S12: **Data from the preliminary CpHMD simulations to compare with the hyper-reactive lysine/cysteine residues discovered by chemical proteomic experiments.**<sup>5-7</sup> Titration plots for a) C22 of the MAP3 kinase ZAK (PDB: 5X5O) and b) K88 (K71 in the PDB file) of the Adenosine kinase ADK (PDB: 1BX4). These simulations were performed on a GPU card using our newly developed GPU-accelerated CpHMD implementation (Harris and Shen, manuscript submitted). Instead of pH replica-exchange, single-pH simulations were used. Otherwise, the simulation setup was identical to the one described in the main text. For ZAK, 5 10-ns simulations were run at each of the following pH values: 6.0, 6.5, 7.0, 7.5, 8.0, 8.5, and 9.0. For ADK, 6 10-ns simulations were run at each of the following pH values: 6.0, 6.5, 7.0, 7.5, 8.0, 8.5, and 9.0. For each simulation, an unprotonated fraction was calculated from the second half of the trajectory (5–10 ns). A data point represents the average unprotonated fraction calculated from multiple simulations at the same pH. The fitting  $pK_a$  was obtained from the best fit of the average unprotonated fractions at different pH to the generalized Henderson-Hasselbalch equation.

## References

- (1) Waterhouse, A.; Bertoni, M.; Bienert, S.; Studer, G.; Tauriello, G.; Gumienny, R.; Heer, F. T.; de Beer, T. A.; Rempfer, C.; Bordoli, L.; Lepore, R.; Schwede, T. SWISS-MODEL: homology modelling of protein structures and complexes. *Nucleic Acids Res.* **2018**, *46*, 296–303.
- (2) Wang, P.-F.; McLeish, M. J.; Kneen, M. M.; Lee, G.; Kenyon, G. L. An Unusually Low  $pK_a$  for Cys282 in the Active Site of Human Muscle Creatine Kinase. *Biochemistry* **2001**, *40*, 11698–11705.
- (3) Isom, D. G.; Castañeda, C. A.; Cannon, B. R.; García-Moreno E., B. Large shifts in  $pK_a$  values of lysine residues buried inside a protein. *Proc. Natl. Acad. Sci. USA* **2011**, *108*, 5260–5265.
- (4) Søndergaard, C. R.; Mats H. M. Olsson, M. R.; Jensen, J. H. Improved Treatment of Ligands and Coupling Effects in Empirical Calculation and Rationalization of  $pK_a$  Values. *J. Chem. Theory Comput.* **2011**, *7*, 2284–2295.
- (5) Wang, C.; Weerapana, E.; Blewett, M. M.; Cravatt, B. F. A chemoproteomic platform to quantitatively map targets of lipid-derived electrophiles. *Nat. Methods* **2014**, *11*, 79–88.
- (6) Backus, K. M.; Correia, B. E.; Lum, K. M.; Forli, S.; Horning, B. D.; González-Páez, G. E.; Chatterjee, S.; Lanning, B. R.; Teijaro, J. R.; Olson, A. J.; Wolan, D. W.; Cravatt, B. F. Proteome-wide covalent ligand discovery in native biological systems. *Nature* **2016**, *534*, 570–574.
- (7) Hacker, S. M.; Backus, K. M.; Lazear, M. R.; Forli, S.; Correia, B. E.; Cravatt, B. F. Global profiling of lysine reactivity and ligandability in the human proteome. *Nat. Chem.* **2017**, *9*, 1181–1190.
